# Supplementary material for: Exploring the Potential of Olfactory Receptor Circulating RNA Measurement for Preeclampsia Prediction and Its Linkage to Mild Gestational Hypothyroidism
Source: MDPI journal article supplement (doi:10.3390/ijms242316681), 2023-11-24
Supplement: s1 [file s1]

## SUPPLEMENTARY MATERIAL

**Supplementary Table S1. Olfactory Receptors (ORs) differentially expressed genes (DEG) list.** We show the logarithmic fold change (logFC) of the 320 ORs from mild nontreated gestational hypothyroidism (GHT) compared with the healthy thyroid pregnancy (HTP). We also show the 317 ORs differentially expressed in preeclampsia (PEC) and 320 ORs in HTP. Healthy nonpregnant women libraries were used to evaluate the DEG in HTP.

| Symbol         | LogFC.GHT_HTP | LogFC.PEC_HTP | LogFC.HTP_NPG | Gene name                                                           |
|----------------|---------------|---------------|---------------|---------------------------------------------------------------------|
| <i>OR10A2</i>  | -3,22E+13     | -2,78E+14     | 2,63E+14      | olfactory receptor family 10 subfamily A member 2                   |
| <i>OR10A3</i>  | -4,32E+14     | -3,58E+14     | 2,90E+14      | olfactory receptor family 10 subfamily A member 3                   |
| <i>OR10A4</i>  | -3,34E+14     | -2,07E+14     | 2,94E+14      | olfactory receptor family 10 subfamily A member 4                   |
| <i>OR10A5</i>  | -3,30E+14     | -2,49E+14     | 2,30E+14      | olfactory receptor family 10 subfamily A member 5                   |
| <i>OR10A6</i>  | -6,19E+14     | -2,37E+14     | 2,76E+14      | olfactory receptor family 10 subfamily A member 6 (gene/pseudogene) |
| <i>OR10A7</i>  | -3,57E+14     | -3,13E+14     | 3,09E+14      | olfactory receptor family 10 subfamily A member 7                   |
| <i>OR10AG1</i> | -2,54E+13     | -6,44E+14     | 2,98E+14      | olfactory receptor family 10 subfamily AG member 1                  |
| <i>OR10C1</i>  | -3,56E+14     | -3,60E+11     | 3,20E+14      | olfactory receptor family 10 subfamily C member 1 (gene/pseudogene) |
| <i>OR10G3</i>  | -3,44E+14     | -3,83E+14     | 2,00E+14      | olfactory receptor family 10 subfamily G member 3                   |
| <i>OR10G4</i>  | -3,18E+14     | -3,53E+14     | 2,96E+14      | olfactory receptor family 10 subfamily G member 4                   |
| <i>OR10G7</i>  | -3,51E+14     | -4,45E+13     | 2,37E+14      | olfactory receptor family 10 subfamily G member 7                   |
| <i>OR10G8</i>  | -3,61E+14     | -3,26E+14     | 3,15E+14      | olfactory receptor family 10 subfamily G member 8                   |
| <i>OR10G9</i>  | -4,97E+14     | -3,72E+14     | 3,45E+14      | olfactory receptor family 10 subfamily G member 9                   |
| <i>OR10H1</i>  | -3,37E+14     | -5,54E+12     | 2,55E+14      | olfactory receptor family 10 subfamily H member 1                   |
| <i>OR10H2</i>  | -2,51E+14     | -3,83E+14     | 2,21E+14      | olfactory receptor family 10 subfamily H member 2                   |
| <i>OR10H3</i>  | -4,48E+14     | -2,72E+14     | 2,99E+14      | olfactory receptor family 10 subfamily H member 3                   |
| <i>OR10H4</i>  | -3,88E+14     | -3,81E+14     | 2,68E+14      | olfactory receptor family 10 subfamily H member 4                   |
| <i>OR10H5</i>  | -2,56E+14     | -3,26E+14     | 2,46E+12      | olfactory receptor family 10 subfamily H member 5                   |
| <i>OR10J1</i>  | -2,76E+14     | -4,70E+14     | 3,13E+14      | olfactory receptor family 10 subfamily J member 1                   |
| <i>OR10J3</i>  | -2,32E+14     | -2,75E+14     | 2,42E+14      | olfactory receptor family 10 subfamily J member 3                   |
| <i>OR10J5</i>  | -3,97E+14     | -3,62E+14     | 2,68E+14      | olfactory receptor family 10 subfamily J member 5                   |
| <i>OR10K1</i>  | -2,68E+14     | -2,76E+14     | 2,91E+14      | olfactory receptor family 10 subfamily K member 1                   |
| <i>OR10K2</i>  | -2,81E+14     | -2,71E+14     | 2,26E+14      | olfactory receptor family 10 subfamily K member 2                   |

|                |           |           |          |                                                                           |
|----------------|-----------|-----------|----------|---------------------------------------------------------------------------|
| <i>OR10P1</i>  | -6,60E+14 | -3,17E+14 | 2,36E+14 | olfactory receptor family 10<br>subfamily P member 1                      |
| <i>OR10Q1</i>  | -3,87E+14 | -1,81E+13 | 3,33E+13 | olfactory receptor family 10<br>subfamily Q member 1                      |
| <i>OR10R2</i>  | -4,61E+14 | -3,28E+14 | 2,41E+14 | olfactory receptor family 10<br>subfamily R member 2                      |
| <i>OR10S1</i>  | -2,43E+14 | -3,85E+14 | 1,84E+13 | olfactory receptor family 10<br>subfamily S member 1                      |
| <i>OR10T2</i>  | -2,85E+14 | -4,16E+14 | 2,71E+14 | olfactory receptor family 10<br>subfamily T member 2                      |
| <i>OR10V1</i>  | -2,45E+14 | -2,67E+14 | 2,80E+14 | olfactory receptor family 10<br>subfamily V member 1                      |
| <i>OR10W1</i>  | -2,82E+14 | -3,08E+14 | 2,58E+14 | olfactory receptor family 10<br>subfamily W member 1                      |
| <i>OR10X1</i>  | -7,31E+14 | -2,88E+13 | 2,81E+14 | olfactory receptor family 10<br>subfamily X member 1<br>(gene/pseudogene) |
| <i>OR10Z1</i>  | -2,25E+14 | -2,43E+14 | 2,50E+13 | olfactory receptor family 10<br>subfamily Z member 1                      |
| <i>OR11G2</i>  | -3,23E+14 | -2,53E+14 | 3,02E+14 | olfactory receptor family 11<br>subfamily G member 2                      |
| <i>OR11H1</i>  | -2,82E+13 | -3,11E+14 | 3,13E+14 | olfactory receptor family 11<br>subfamily H member 1                      |
| <i>OR11H12</i> | -3,93E+14 | -4,02E+14 | 3,25E+14 | olfactory receptor family 11<br>subfamily H member 12                     |
| <i>OR11H2</i>  | -3,09E+14 | -2,76E+14 | 3,47E+14 | olfactory receptor family 11<br>subfamily H member 2                      |
| <i>OR11H4</i>  | -3,33E+14 | -1,81E+14 | 1,83E+14 | olfactory receptor family 11<br>subfamily H member 4                      |
| <i>OR11H6</i>  | -2,13E+14 | -3,90E+14 | 2,95E+14 | olfactory receptor family 11<br>subfamily H member 6                      |
| <i>OR11L1</i>  | -3,43E+14 | -5,97E+14 | 1,96E+14 | olfactory receptor family 11<br>subfamily L member 1                      |
| <i>OR12D2</i>  | -3,80E+14 | -3,36E+14 | 2,29E+14 | olfactory receptor family 12<br>subfamily D member 2<br>(gene/pseudogene) |
| <i>OR12D3</i>  | -4,48E+14 | -5,25E+14 | 3,01E+14 | olfactory receptor family 12<br>subfamily D member 3                      |
| <i>OR13C2</i>  | -3,72E+14 | -4,29E+14 | 2,54E+14 | olfactory receptor family 13<br>subfamily C member 2                      |
| <i>OR13C3</i>  | -3,22E+14 | -1,75E+14 | 2,47E+14 | olfactory receptor family 13<br>subfamily C member 3                      |
| <i>OR13C4</i>  | -2,78E+14 | -3,89E+14 | 2,82E+14 | olfactory receptor family 13<br>subfamily C member 4                      |
| <i>OR13C5</i>  | -4,87E+13 | -2,93E+14 | 2,15E+14 | olfactory receptor family 13<br>subfamily C member 5                      |
| <i>OR13C8</i>  | -3,63E+14 | -2,94E+14 | 2,04E+14 | olfactory receptor family 13<br>subfamily C member 8                      |
| <i>OR13C9</i>  | -4,09E+14 | -2,99E+14 | 3,25E+14 | olfactory receptor family 13<br>subfamily C member 9                      |
| <i>OR13F1</i>  | -3,12E+14 | -3,53E+14 | 2,43E+14 | olfactory receptor family 13<br>subfamily F member 1                      |
| <i>OR13G1</i>  | -1,18E+14 | -5,08E+14 |          | olfactory receptor family 13<br>subfamily G member 1                      |
| <i>OR13H1</i>  | -2,40E+14 | -3,56E+14 | 2,94E+14 | olfactory receptor family 13<br>subfamily H member 1                      |
| <i>OR13J1</i>  | -2,47E+14 | -3,33E+14 | 2,22E+14 | olfactory receptor family 13<br>subfamily J member 1                      |

|                |           |           |          |                                                                          |
|----------------|-----------|-----------|----------|--------------------------------------------------------------------------|
| <i>OR14A16</i> | -2,89E+14 | -2,97E+14 | 2,72E+14 | olfactory receptor family 14<br>subfamily A member 16                    |
| <i>OR14C36</i> | -4,33E+14 | -3,08E+14 | 3,32E+14 | olfactory receptor family 14<br>subfamily C member 36                    |
| <i>OR14I1</i>  | -1,93E+13 | -3,76E+14 | 2,40E+14 | olfactory receptor family 14<br>subfamily I member 1                     |
| <i>OR14J1</i>  | -2,31E+14 | -2,77E+14 | 3,07E+14 | olfactory receptor family 14<br>subfamily J member 1                     |
| <i>OR1A1</i>   | -4,46E+14 | -2,88E+14 | 2,54E+14 | olfactory receptor family 1<br>subfamily A member 1<br>(gene/pseudogene) |
| <i>OR1A2</i>   | -3,48E+14 | -2,53E+14 | 3,48E+14 | olfactory receptor family 1<br>subfamily A member 2                      |
| <i>OR1B1</i>   | -7,48E+13 | -2,94E+14 | 3,42E+14 | olfactory receptor family 1<br>subfamily B member 1<br>(gene/pseudogene) |
| <i>OR1D2</i>   | -4,87E+13 | -3,60E+14 | 3,15E+14 | olfactory receptor family 1<br>subfamily D member 2                      |
| <i>OR1D5</i>   | -2,86E+14 | -3,24E+13 | 2,03E+14 | olfactory receptor family 1<br>subfamily D member 5                      |
| <i>OR1E1</i>   | -2,65E+14 | -3,47E+14 | 3,08E+14 | olfactory receptor family 1<br>subfamily E member 1                      |
| <i>OR1E2</i>   | -3,12E+14 | -2,90E+14 | 2,67E+12 | olfactory receptor family 1<br>subfamily E member 2                      |
| <i>OR1F1</i>   | -3,50E+14 | -2,76E+14 | 1,96E+13 | olfactory receptor family 1<br>subfamily F member 1                      |
| <i>OR1G1</i>   | -2,23E+14 | -4,49E+14 | 3,72E+14 | olfactory receptor family 1<br>subfamily G member 1                      |
| <i>OR1I1</i>   | -4,01E+14 | -2,25E+14 | 2,89E+14 | olfactory receptor family 1<br>subfamily I member 1                      |
| <i>OR1J1</i>   | -3,01E+14 | -2,99E+14 | 2,00E+13 | olfactory receptor family 1<br>subfamily J member 1                      |
| <i>OR1J2</i>   | -3,77E+14 | -3,67E+14 | 2,26E+14 | olfactory receptor family 1<br>subfamily J member 2                      |
| <i>OR1J4</i>   | -3,70E+14 | -3,89E+14 | 1,92E+14 | olfactory receptor family 1<br>subfamily J member 4                      |
| <i>OR1L1</i>   | -2,90E+14 | -2,77E+14 | 2,31E+14 | olfactory receptor family 1<br>subfamily L member 1                      |
| <i>OR1L3</i>   | -5,14E+14 | -3,08E+14 | 3,06E+14 | olfactory receptor family 1<br>subfamily L member 3                      |
| <i>OR1L4</i>   | -1,93E+14 | -1,46E+14 | 1,75E+14 | olfactory receptor family 1<br>subfamily L member 4                      |
| <i>OR1L6</i>   | -2,03E+14 | -1,99E+14 |          | olfactory receptor family 1<br>subfamily L member 6                      |
| <i>OR1L8</i>   | -2,36E+13 | -3,69E+14 | 3,05E+14 | olfactory receptor family 1<br>subfamily L member 8                      |
| <i>OR1M1</i>   | -2,43E+14 | -3,72E+14 | 2,59E+14 | olfactory receptor family 1<br>subfamily M member 1                      |
| <i>OR1N2</i>   | -3,24E+14 | -2,41E+14 | 2,22E+14 | olfactory receptor family 1<br>subfamily N member 2                      |
| <i>OR1Q1</i>   | -3,88E+14 | -2,82E+13 |          | olfactory receptor family 1<br>subfamily Q member 1                      |
| <i>OR1S1</i>   | -2,60E+14 | -2,77E+14 | 2,99E+14 | olfactory receptor family 1<br>subfamily S member 1<br>(gene/pseudogene) |
| <i>OR1S2</i>   | -3,44E+14 | -4,25E+14 | 3,55E+14 | olfactory receptor family 1<br>subfamily S member 2                      |
| <i>OR2A12</i>  | -3,65E+14 | -2,32E+14 | 2,75E+14 | olfactory receptor family 2<br>subfamily A member 12                     |

|               |           |           |          |                                                                           |
|---------------|-----------|-----------|----------|---------------------------------------------------------------------------|
| <i>OR2A14</i> | -4,00E+14 | -3,34E+14 | 2,00E+14 | olfactory receptor family 2<br>subfamily A member 14                      |
| <i>OR2A2</i>  | -3,43E+14 | -2,84E+14 | 3,25E+14 | olfactory receptor family 2<br>subfamily A member 2                       |
| <i>OR2A25</i> | -3,33E+14 | -2,34E+14 | 2,72E+14 | olfactory receptor family 2<br>subfamily A member 25                      |
| <i>OR2A5</i>  | -7,43E+14 | -2,77E+13 | 3,67E+14 | olfactory receptor family 2<br>subfamily A member 5                       |
| <i>OR2AG1</i> | -3,60E+14 | -3,19E+14 | 2,19E+14 | olfactory receptor family 2<br>subfamily AG member 1<br>(gene/pseudogene) |
| <i>OR2AG2</i> | -4,23E+14 | -4,15E+14 | 2,35E+14 | olfactory receptor family 2<br>subfamily AG member 2                      |
| <i>OR2AT4</i> | -5,06E+14 | -2,94E+14 | 3,13E+14 | olfactory receptor family 2<br>subfamily AT member 4                      |
| <i>OR2B2</i>  | -2,11E+14 | -2,75E+14 | 1,78E+14 | olfactory receptor family 2<br>subfamily B member 2                       |
| <i>OR2B3</i>  | -4,13E+14 | -3,09E+14 | 2,98E+14 | olfactory receptor family 2<br>subfamily B member 3                       |
| <i>OR2B6</i>  | -1,01E+14 | -2,78E+14 |          | olfactory receptor family 2<br>subfamily B member 6                       |
| <i>OR2D2</i>  | -4,68E+14 | -3,19E+13 | 2,41E+14 | olfactory receptor family 2<br>subfamily D member 2                       |
| <i>OR2D3</i>  | -2,75E+14 | -2,83E+14 | 2,12E+13 | olfactory receptor family 2<br>subfamily D member 3                       |
| <i>OR2F1</i>  | -2,00E+14 | -4,31E+14 | 2,03E+14 | olfactory receptor family 2<br>subfamily F member 1<br>(gene/pseudogene)  |
| <i>OR2F2</i>  | -4,11E+14 | -3,48E+14 | 1,65E+14 | olfactory receptor family 2<br>subfamily F member 2                       |
| <i>OR2G2</i>  | -3,02E+14 | -3,79E+14 | 2,17E+13 | olfactory receptor family 2<br>subfamily G member 2                       |
| <i>OR2G3</i>  | -4,75E+14 | -3,24E+14 | 2,37E+14 | olfactory receptor family 2<br>subfamily G member 3                       |
| <i>OR2G6</i>  | -3,69E+14 | -3,36E+14 | 1,82E+14 | olfactory receptor family 2<br>subfamily G member 6                       |
| <i>OR2H2</i>  | -2,29E+14 | -2,05E+14 | 1,96E+14 | olfactory receptor family 2<br>subfamily H member 2                       |
| <i>OR2J3</i>  | -3,18E+14 | -2,64E+14 | 2,43E+14 | olfactory receptor family 2<br>subfamily J member 3                       |
| <i>OR2K2</i>  | -3,44E+14 | -4,37E+13 | 2,77E+14 | olfactory receptor family 2<br>subfamily K member 2                       |
| <i>OR2L3</i>  | -2,94E+14 | -2,84E+14 | 2,47E+14 | olfactory receptor family 2<br>subfamily L member 3                       |
| <i>OR2M1P</i> | -3,93E+14 | -2,07E+14 | 3,44E+14 | olfactory receptor family 2<br>subfamily M member 1<br>pseudogene         |
| <i>OR2M2</i>  | -2,13E+14 | -2,57E+13 | 1,84E+14 | olfactory receptor family 2<br>subfamily M member 2                       |
| <i>OR2M3</i>  | -3,28E+14 | -2,36E+14 |          | olfactory receptor family 2<br>subfamily M member 3                       |
| <i>OR2M4</i>  | -2,45E+14 | -3,08E+14 | 3,87E+14 | olfactory receptor family 2<br>subfamily M member 4                       |
| <i>OR2M5</i>  | -3,28E+14 | -4,46E+14 | 4,13E+14 | olfactory receptor family 2<br>subfamily M member 5                       |
| <i>OR2M7</i>  | -1,56E+14 | -2,69E+14 |          | olfactory receptor family 2<br>subfamily M member 7                       |

|               |           |           |          |                                                                          |
|---------------|-----------|-----------|----------|--------------------------------------------------------------------------|
| <i>OR2S2</i>  | -2,58E+14 | -5,03E+14 | 2,76E+14 | olfactory receptor family 2<br>subfamily S member 2<br>(gene/pseudogene) |
| <i>OR2T1</i>  | -3,32E+14 | -3,51E+14 | 2,90E+14 | olfactory receptor family 2<br>subfamily T member 1                      |
| <i>OR2T10</i> | -2,54E+14 | -2,56E+14 | 1,58E+14 | olfactory receptor family 2<br>subfamily T member 10                     |
| <i>OR2T12</i> | -4,11E+14 |           | 2,67E+14 | olfactory receptor family 2<br>subfamily T member 12                     |
| <i>OR2T2</i>  | -2,50E+13 | -2,93E+14 | 2,40E+14 | olfactory receptor family 2<br>subfamily T member 2                      |
| <i>OR2T27</i> | -3,67E+14 | -3,76E+13 | 3,20E+14 | olfactory receptor family 2<br>subfamily T member 27                     |
| <i>OR2T29</i> | -2,87E+14 | -2,46E+14 | 3,45E+14 | olfactory receptor family 2<br>subfamily T member 29                     |
| <i>OR2T35</i> | -2,27E+14 | -1,94E+13 | 1,88E+14 | olfactory receptor family 2<br>subfamily T member 35                     |
| <i>OR2T4</i>  | -3,51E+14 | -4,06E+14 | 3,15E+14 | olfactory receptor family 2<br>subfamily T member 4                      |
| <i>OR2T5</i>  | -6,14E+14 | -1,74E+13 | 2,31E+14 | olfactory receptor family 2<br>subfamily T member 5                      |
| <i>OR2T6</i>  | -2,82E+14 | -3,64E+14 | 1,91E+14 | olfactory receptor family 2<br>subfamily T member 6                      |
| <i>OR2V2</i>  | -3,71E+14 | -3,17E+14 | 2,58E+14 | olfactory receptor family 2<br>subfamily V member 2                      |
| <i>OR2W1</i>  | -5,75E+14 | -1,71E+14 | 2,36E+14 | olfactory receptor family 2<br>subfamily W member 1                      |
| <i>OR2W3</i>  | -1,89E+14 |           | 1,40E+14 | olfactory receptor family 2<br>subfamily W member 3                      |
| <i>OR2W5</i>  | -2,24E+14 | -3,58E+14 | 2,81E+14 | olfactory receptor family 2<br>subfamily W member 5<br>(gene/pseudogene) |
| <i>OR2Y1</i>  | -2,61E+14 | -2,65E+14 | 1,60E+14 | olfactory receptor family 2<br>subfamily Y member 1                      |
| <i>OR2Z1</i>  | -3,41E+14 | -3,31E+14 | 2,12E+14 | olfactory receptor family 2<br>subfamily Z member 1                      |
| <i>OR3A1</i>  | -3,17E+14 | -2,43E+14 | 1,57E+14 | olfactory receptor family 3<br>subfamily A member 1<br>(gene/pseudogene) |
| <i>OR3A3</i>  | -3,56E+14 | -5,70E+14 | 3,05E+14 | olfactory receptor family 3<br>subfamily A member 3                      |
| <i>OR3A4P</i> | -2,73E+14 | -3,60E+14 | 3,09E+14 | olfactory receptor family 3<br>subfamily A member 4<br>pseudogene        |
| <i>OR4A15</i> | -3,06E+14 | -3,44E+14 | 1,90E+14 | olfactory receptor family 4<br>subfamily A member 15                     |
| <i>OR4A16</i> | -2,69E+14 | -3,21E+14 | 2,58E+14 | olfactory receptor family 4<br>subfamily A member 16                     |
| <i>OR4A47</i> | -2,68E+14 | -2,85E+14 | 2,36E+14 | olfactory receptor family 4<br>subfamily A member 47                     |
| <i>OR4A5</i>  | -3,33E+14 | -4,09E+14 | 4,53E+14 | olfactory receptor family 4<br>subfamily A member 5                      |
| <i>OR4B1</i>  | -3,36E+14 | -3,62E+14 | 2,53E+14 | olfactory receptor family 4<br>subfamily B member 1                      |
| <i>OR4C12</i> | -6,28E+14 | -6,28E+14 | 2,35E+14 | olfactory receptor family 4<br>subfamily C member 12                     |
| <i>OR4C13</i> | -2,71E+14 | -3,01E+14 | 3,65E+14 | olfactory receptor family 4<br>subfamily C member 13                     |

|               |           |           |          |                                                                           |
|---------------|-----------|-----------|----------|---------------------------------------------------------------------------|
| <i>OR4C15</i> | -4,69E+14 | -5,41E+14 | 4,46E+14 | olfactory receptor family 4<br>subfamily C member 15                      |
| <i>OR4C16</i> | -4,17E+14 | -2,92E+14 | 3,49E+13 | olfactory receptor family 4<br>subfamily C member 16<br>(gene/pseudogene) |
| <i>OR4C3</i>  | -4,17E+14 | -3,62E+14 | 2,07E+14 | olfactory receptor family 4<br>subfamily C member 3                       |
| <i>OR4C46</i> | -3,18E+14 | -3,39E+13 | 3,00E+14 | olfactory receptor family 4<br>subfamily C member 46                      |
| <i>OR4C6</i>  | -3,74E+14 | -3,12E+14 | 3,55E+14 | olfactory receptor family 4<br>subfamily C member 6                       |
| <i>OR4D10</i> | -3,29E+14 | -2,81E+14 | 1,96E+14 | olfactory receptor family 4<br>subfamily D member 10                      |
| <i>OR4D11</i> | -4,63E+14 | -3,30E+14 | 2,81E+14 | olfactory receptor family 4<br>subfamily D member 11                      |
| <i>OR4D2</i>  | -3,20E+14 | -3,08E+14 | 1,88E+14 | olfactory receptor family 4<br>subfamily D member 2                       |
| <i>OR4D5</i>  | -2,89E+14 | -3,27E+14 | 2,51E+13 | olfactory receptor family 4<br>subfamily D member 5                       |
| <i>OR4D6</i>  | -2,55E+14 | -4,53E+14 | 1,94E+14 | olfactory receptor family 4<br>subfamily D member 6                       |
| <i>OR4D9</i>  | -3,79E+14 | -3,20E+14 | 2,69E+14 | olfactory receptor family 4<br>subfamily D member 9                       |
| <i>OR4E2</i>  | -3,44E+14 | -3,05E+13 | 2,64E+14 | olfactory receptor family 4<br>subfamily E member 2<br>(gene/pseudogene)  |
| <i>OR4F15</i> | -3,11E+14 | -2,77E+14 | 1,65E+14 | olfactory receptor family 4<br>subfamily F member 15                      |
| <i>OR4F16</i> | -2,32E+14 | -1,03E+14 | 1,40E+14 | olfactory receptor family 4<br>subfamily F member 16                      |
| <i>OR4F17</i> | -3,12E+14 | -1,88E+14 | 3,11E+14 | olfactory receptor family 4<br>subfamily F member 17                      |
| <i>OR4F21</i> | -2,14E+14 | -1,27E+14 | 1,83E+14 | olfactory receptor family 4<br>subfamily F member 21                      |
| <i>OR4F29</i> | -3,60E+14 | -1,62E+14 | 2,16E+14 | olfactory receptor family 4<br>subfamily F member 29                      |
| <i>OR4F3</i>  | -3,15E+14 | -1,03E+14 | 1,69E+14 | olfactory receptor family 4<br>subfamily F member 3                       |
| <i>OR4F4</i>  | -2,74E+14 | -1,91E+14 | 3,42E+14 | olfactory receptor family 4<br>subfamily F member 4                       |
| <i>OR4F5</i>  | -3,85E+14 | -1,19E+14 | 2,79E+14 | olfactory receptor family 4<br>subfamily F member 5                       |
| <i>OR4F6</i>  | -4,25E+14 | -2,69E+13 | 2,53E+14 | olfactory receptor family 4<br>subfamily F member 6                       |
| <i>OR4K1</i>  | -3,54E+14 | -2,49E+14 | 3,48E+14 | olfactory receptor family 4<br>subfamily K member 1                       |
| <i>OR4K13</i> | -4,12E+14 | -5,70E+14 | 2,14E+14 | olfactory receptor family 4<br>subfamily K member 13                      |
| <i>OR4K14</i> | -5,27E+14 | -3,17E+14 | 2,36E+14 | olfactory receptor family 4<br>subfamily K member 14                      |
| <i>OR4K15</i> | -4,23E+14 | -3,35E+14 | 2,97E+14 | olfactory receptor family 4<br>subfamily K member 15                      |
| <i>OR4K17</i> | -2,96E+14 | -5,45E+14 |          | olfactory receptor family 4<br>subfamily K member 17                      |
| <i>OR4K2</i>  | -3,53E+14 | -4,78E+14 | 2,93E+14 | olfactory receptor family 4<br>subfamily K member 2                       |
| <i>OR4K5</i>  | -3,07E+13 | -3,00E+14 | 2,88E+14 | olfactory receptor family 4<br>subfamily K member 5                       |

|               |           |           |          |                                                                           |
|---------------|-----------|-----------|----------|---------------------------------------------------------------------------|
| <i>OR4L1</i>  | -3,52E+13 | -3,17E+14 | 4,05E+14 | olfactory receptor family 4<br>subfamily L member 1<br>(gene/pseudogene)  |
| <i>OR4M1</i>  | -4,59E+14 | -4,89E+14 | 3,37E+14 | olfactory receptor family 4<br>subfamily M member 1                       |
| <i>OR4M2</i>  | -3,89E+14 | -4,34E+14 | 3,63E+14 | olfactory receptor family 4<br>subfamily M member 2                       |
| <i>OR4N2</i>  | -3,08E+14 | -4,32E+14 | 3,09E+14 | olfactory receptor family 4<br>subfamily N member 2                       |
| <i>OR4N3P</i> | -4,21E+14 | -4,30E+14 | 2,92E+14 | olfactory receptor family 4<br>subfamily N member 3<br>pseudogene         |
| <i>OR4N4</i>  | -2,85E+14 | -2,50E+14 | 2,36E+14 | olfactory receptor family 4<br>subfamily N member 4                       |
| <i>OR4N5</i>  | -3,85E+14 | -3,47E+14 | 2,86E+14 | olfactory receptor family 4<br>subfamily N member 5                       |
| <i>OR4Q3</i>  | -3,57E+13 | -1,73E+14 | 2,72E+14 | olfactory receptor family 4<br>subfamily Q member 3                       |
| <i>OR4S1</i>  | -3,94E+14 | -5,23E+13 | 3,06E+14 | olfactory receptor family 4<br>subfamily S member 1                       |
| <i>OR4X1</i>  | -3,46E+14 | -3,60E+14 | 3,51E+14 | olfactory receptor family 4<br>subfamily X member 1<br>(gene/pseudogene)  |
| <i>OR4X2</i>  | -2,91E+14 | -2,65E+14 | 3,46E+14 | olfactory receptor family 4<br>subfamily X member 2<br>(gene/pseudogene)  |
| <i>OR51A2</i> | -2,34E+14 | -4,42E+14 | 2,02E+14 | olfactory receptor family 51<br>subfamily A member 2                      |
| <i>OR51A4</i> | -2,77E+14 | -3,34E+14 | 2,69E+13 | olfactory receptor family 51<br>subfamily A member 4                      |
| <i>OR51A7</i> | -3,87E+14 | -3,88E+14 | 3,51E+14 | olfactory receptor family 51<br>subfamily A member 7                      |
| <i>OR51B2</i> | -2,47E+14 | -2,24E+14 | 3,13E+14 | olfactory receptor family 51<br>subfamily B member 2<br>(gene/pseudogene) |
| <i>OR51B4</i> | -3,77E+14 | -3,22E+14 | 2,85E+14 | olfactory receptor family 51<br>subfamily B member 4                      |
| <i>OR51B6</i> | -3,59E+14 | -3,42E+14 | 2,57E+14 | olfactory receptor family 51<br>subfamily B member 6                      |
| <i>OR51D1</i> | -3,88E+14 | -2,55E+12 | 2,73E+14 | olfactory receptor family 51<br>subfamily D member 1                      |
| <i>OR51F1</i> | -3,41E+14 | -4,71E+14 | 2,73E+14 | olfactory receptor family 51<br>subfamily F member 1<br>(gene/pseudogene) |
| <i>OR51F2</i> | -1,89E+13 | -3,88E+14 | 2,52E+14 | olfactory receptor family 51<br>subfamily F member 2                      |
| <i>OR51G1</i> | -2,51E+14 | -2,35E+14 | 1,84E+14 | olfactory receptor family 51<br>subfamily G member 1<br>(gene/pseudogene) |
| <i>OR51G2</i> | -5,10E+14 | -4,98E+13 | 3,04E+13 | olfactory receptor family 51<br>subfamily G member 2                      |
| <i>OR51I1</i> | -2,34E+14 | -3,18E+14 | 3,05E+14 | olfactory receptor family 51<br>subfamily I member 1                      |
| <i>OR51I2</i> | -4,25E+14 | -2,35E+14 | 2,90E+13 | olfactory receptor family 51<br>subfamily I member 2                      |
| <i>OR51L1</i> | -2,86E+13 | -3,16E+14 | 2,79E+14 | olfactory receptor family 51<br>subfamily L member 1                      |
| <i>OR51M1</i> | -2,28E+14 | -2,35E+14 | 2,01E+14 | olfactory receptor family 51<br>subfamily M member 1                      |

|               |           |           |          |                                                                           |
|---------------|-----------|-----------|----------|---------------------------------------------------------------------------|
| <i>OR51Q1</i> | -3,44E+14 | -2,57E+14 | 2,17E+14 | olfactory receptor family 51<br>subfamily Q member 1<br>(gene/pseudogene) |
| <i>OR51S1</i> | -3,45E+14 | -4,70E+14 | 3,51E+14 | olfactory receptor family 51<br>subfamily S member 1                      |
| <i>OR51T1</i> | -2,57E+14 | -3,27E+14 | 2,96E+14 | olfactory receptor family 51<br>subfamily T member 1                      |
| <i>OR51V1</i> | -3,07E+13 | -3,97E+14 | 3,02E+14 | olfactory receptor family 51<br>subfamily V member 1                      |
| <i>OR52A1</i> | -2,14E+14 | -3,17E+14 | 2,58E+14 | olfactory receptor family 52<br>subfamily A member 1                      |
| <i>OR52A5</i> | -2,71E+14 | -3,59E+14 | 3,08E+14 | olfactory receptor family 52<br>subfamily A member 5                      |
| <i>OR52B2</i> | -2,69E+14 | -1,25E+14 | 2,47E+14 | olfactory receptor family 52<br>subfamily B member 2                      |
| <i>OR52B4</i> | -2,67E+11 | -2,74E+14 | 3,06E+14 | olfactory receptor family 52<br>subfamily B member 4<br>(gene/pseudogene) |
| <i>OR52D1</i> | -2,89E+14 | -3,74E+14 | 2,67E+14 | olfactory receptor family 52<br>subfamily D member 1<br>(gene/pseudogene) |
| <i>OR52E2</i> | -3,63E+14 | -3,09E+14 | 2,74E+14 | olfactory receptor family 52<br>subfamily E member 2                      |
| <i>OR52E4</i> | -2,48E+14 | -2,87E+14 | 4,85E+14 | olfactory receptor family 52<br>subfamily E member 4                      |
| <i>OR52E6</i> | -2,65E+13 | -4,08E+14 | 2,17E+14 | olfactory receptor family 52<br>subfamily E member 6                      |
| <i>OR52E8</i> | -4,82E+13 | -3,87E+14 | 2,91E+13 | olfactory receptor family 52<br>subfamily E member 8                      |
| <i>OR52I2</i> | -1,75E+14 | -2,64E+14 | 1,56E+14 | olfactory receptor family 52<br>subfamily I member 2                      |
| <i>OR52J3</i> | -2,89E+14 | -3,19E+14 | 2,51E+14 | olfactory receptor family 52<br>subfamily J member 3                      |
| <i>OR52L1</i> | -2,24E+14 | -2,11E+14 | 2,40E+14 | olfactory receptor family 52<br>subfamily L member 1<br>(gene/pseudogene) |
| <i>OR52M1</i> | -4,58E+14 | -3,33E+14 | 2,26E+14 | olfactory receptor family 52<br>subfamily M member 1                      |
| <i>OR52N1</i> | -6,92E+14 | -3,48E+14 | 3,18E+14 | olfactory receptor family 52<br>subfamily N member 1                      |
| <i>OR52N2</i> | -2,07E+13 | -3,57E+14 | 2,39E+14 | olfactory receptor family 52<br>subfamily N member 2                      |
| <i>OR52N5</i> | -2,73E+14 | -2,59E+14 | 2,12E+14 | olfactory receptor family 52<br>subfamily N member 5                      |
| <i>OR52R1</i> | -3,45E+14 | -2,84E+13 | 3,14E+14 | olfactory receptor family 52<br>subfamily R member 1<br>(gene/pseudogene) |
| <i>OR56A1</i> | -4,05E+13 | -3,01E+14 | 2,67E+14 | olfactory receptor family 56<br>subfamily A member 1                      |
| <i>OR56A3</i> | -3,60E+14 | -3,65E+14 | 2,54E+14 | olfactory receptor family 56<br>subfamily A member 3                      |
| <i>OR56A5</i> | -3,33E+14 | -3,25E+14 | 2,45E+14 | olfactory receptor family 56<br>subfamily A member 5                      |
| <i>OR56B4</i> | -2,78E+14 | -1,79E+14 | 2,49E+14 | olfactory receptor family 56<br>subfamily B member 4                      |
| <i>OR5A2</i>  | -3,15E+14 | -4,22E+14 | 2,88E+14 | olfactory receptor family 5<br>subfamily A member 2                       |
| <i>OR5AK2</i> | -6,27E+14 | -4,46E+14 | 3,50E+14 | olfactory receptor family 5<br>subfamily AK member 2                      |



|                |           |           |          |                                                                           |
|----------------|-----------|-----------|----------|---------------------------------------------------------------------------|
| <i>OR5AK4P</i> | -4,39E+14 | -4,27E+14 | 3,31E+14 | olfactory receptor family 5<br>subfamily AK member 4<br>pseudogene        |
| <i>OR5AN1</i>  | -2,83E+14 | -2,87E+14 | 2,96E+14 | olfactory receptor family 5<br>subfamily AN member 1                      |
| <i>OR5AP2</i>  | -1,90E+14 | -3,76E+14 | 4,20E+14 | olfactory receptor family 5<br>subfamily AP member 2                      |
| <i>OR5AR1</i>  | -4,45E+14 | -2,93E+14 | 2,17E+14 | olfactory receptor family 5<br>subfamily AR member 1<br>(gene/pseudogene) |
| <i>OR5AS1</i>  | -2,80E+14 | -1,84E+13 | 2,05E+14 | olfactory receptor family 5<br>subfamily AS member 1                      |
| <i>OR5AU1</i>  | -2,70E+14 | -3,41E+13 | 2,88E+14 | olfactory receptor family 5<br>subfamily AU member 1                      |
| <i>OR5B12</i>  | -3,12E+13 | -3,42E+13 | 3,24E+13 | olfactory receptor family 5<br>subfamily B member 12                      |
| <i>OR5B17</i>  | -1,82E+14 | -3,29E+14 | 2,84E+14 | olfactory receptor family 5<br>subfamily B member 17                      |
| <i>OR5B2</i>   | -3,28E+11 | -2,36E+14 | 2,49E+14 | olfactory receptor family 5<br>subfamily B member 2                       |
| <i>OR5B3</i>   | -2,42E+14 | -3,24E+14 |          | olfactory receptor family 5<br>subfamily B member 3                       |
| <i>OR5C1</i>   | -2,73E+14 | -1,81E+14 | 1,83E+14 | olfactory receptor family 5<br>subfamily C member 1                       |
| <i>OR5D13</i>  | -2,49E+14 | -3,03E+14 | 1,93E+14 | olfactory receptor family 5<br>subfamily D member 13<br>(gene/pseudogene) |
| <i>OR5D14</i>  | -3,57E+14 | -2,83E+14 | 2,84E+14 | olfactory receptor family 5<br>subfamily D member 14                      |
| <i>OR5D16</i>  | -6,81E+14 | -5,00E+14 | 4,01E+14 | olfactory receptor family 5<br>subfamily D member 16                      |
| <i>OR5D18</i>  | -7,35E+14 | -4,22E+14 | 3,44E+14 | olfactory receptor family 5<br>subfamily D member 18                      |
| <i>OR5E1P</i>  | -5,99E+14 | -5,99E+14 | 2,27E+14 | olfactory receptor family 5<br>subfamily E member 1<br>pseudogene         |
| <i>OR5F1</i>   | -3,46E+14 | -5,02E+14 | 2,89E+14 | olfactory receptor family 5<br>subfamily F member 1                       |
| <i>OR5H1</i>   | -3,23E+14 | -4,10E+14 | 3,79E+14 | olfactory receptor family 5<br>subfamily H member 1                       |
| <i>OR5H14</i>  | -3,90E+14 | -3,21E+14 | 2,52E+14 | olfactory receptor family 5<br>subfamily H member 14                      |
| <i>OR5H15</i>  | -3,01E+14 | -2,95E+14 | 5,67E+14 | olfactory receptor family 5<br>subfamily H member 15                      |
| <i>OR5H2</i>   | -4,24E+14 | -2,65E+14 | 2,93E+14 | olfactory receptor family 5<br>subfamily H member 2                       |
| <i>OR5H6</i>   | -4,62E+14 | -4,62E+14 |          | olfactory receptor family 5<br>subfamily H member 6<br>(gene/pseudogene)  |
| <i>OR5I1</i>   | -1,53E+14 | -3,32E+14 |          | olfactory receptor family 5<br>subfamily I member 1                       |
| <i>OR5J2</i>   | -3,11E+14 | -4,40E+14 | 2,19E+12 | olfactory receptor family 5<br>subfamily J member 2                       |
| <i>OR5K3</i>   | -2,70E+14 | -2,36E+14 | 2,71E+14 | olfactory receptor family 5<br>subfamily K member 3                       |
| <i>OR5K4</i>   | -3,08E+14 | -3,15E+14 | 2,90E+14 | olfactory receptor family 5<br>subfamily K member 4                       |

|               |           |           |          |                                                                          |
|---------------|-----------|-----------|----------|--------------------------------------------------------------------------|
| <i>OR5L1</i>  | -3,02E+14 | -3,50E+14 | 2,76E+14 | olfactory receptor family 5<br>subfamily L member 1<br>(gene/pseudogene) |
| <i>OR5L2</i>  | -3,86E+14 | -3,11E+14 | 2,76E+14 | olfactory receptor family 5<br>subfamily L member 2                      |
| <i>OR5M1</i>  | -2,52E+14 | -3,38E+14 | 2,63E+14 | olfactory receptor family 5<br>subfamily M member 1                      |
| <i>OR5M10</i> | -4,12E+13 | -4,85E+14 | 2,47E+14 | olfactory receptor family 5<br>subfamily M member 10                     |
| <i>OR5M11</i> | -3,18E+14 | -3,22E+14 | 2,46E+14 | olfactory receptor family 5<br>subfamily M member 11                     |
| <i>OR5M3</i>  | -2,57E+14 | -4,83E+14 | 4,31E+14 | olfactory receptor family 5<br>subfamily M member 3                      |
| <i>OR5M8</i>  | -4,81E+14 | -3,98E+14 | 3,30E+14 | olfactory receptor family 5<br>subfamily M member 8                      |
| <i>OR5M9</i>  | -2,26E+14 | -2,31E+14 | 2,51E+14 | olfactory receptor family 5<br>subfamily M member 9                      |
| <i>OR5P2</i>  | -3,07E+14 | -3,52E+14 | 3,05E+14 | olfactory receptor family 5<br>subfamily P member 2                      |
| <i>OR5P3</i>  | -3,60E+14 | -3,52E+14 | 2,57E+14 | olfactory receptor family 5<br>subfamily P member 3                      |
| <i>OR5R1</i>  | -3,16E+14 | -2,68E+14 | 2,70E+14 | olfactory receptor family 5<br>subfamily R member 1<br>(gene/pseudogene) |
| <i>OR5T1</i>  | -3,21E+14 | -2,31E+14 | 2,91E+14 | olfactory receptor family 5<br>subfamily T member 1                      |
| <i>OR5T2</i>  | -4,36E+14 | -3,03E+14 | 3,51E+14 | olfactory receptor family 5<br>subfamily T member 2                      |
| <i>OR5T3</i>  | -3,94E+14 | -3,44E+14 | 3,42E+14 | olfactory receptor family 5<br>subfamily T member 3                      |
| <i>OR5V1</i>  | -2,67E+14 | -2,64E+14 | 2,34E+14 | olfactory receptor family 5<br>subfamily V member 1                      |
| <i>OR5W2</i>  | -1,97E+14 | -4,09E+14 | 4,38E+14 | olfactory receptor family 5<br>subfamily W member 2                      |
| <i>OR6A2</i>  | -3,52E+14 | -2,87E+14 | 2,84E+14 | olfactory receptor family 6<br>subfamily A member 2                      |
| <i>OR6B1</i>  | -1,97E+14 | -3,67E+14 | 2,28E+13 | olfactory receptor family 6<br>subfamily B member 1                      |
| <i>OR6B2</i>  | -3,39E+14 | -4,35E+14 | 2,54E+14 | olfactory receptor family 6<br>subfamily B member 2                      |
| <i>OR6B3</i>  | -2,85E+14 | -5,94E+14 | 3,15E+14 | olfactory receptor family 6<br>subfamily B member 3                      |
| <i>OR6C1</i>  | -3,22E+14 | -3,64E+14 | 1,82E+14 | olfactory receptor family 6<br>subfamily C member 1                      |
| <i>OR6C3</i>  | -5,17E+14 | -5,17E+14 | 3,58E+14 | olfactory receptor family 6<br>subfamily C member 3                      |
| <i>OR6C4</i>  | -7,28E+14 | -2,55E+14 | 3,04E+14 | olfactory receptor family 6<br>subfamily C member 4                      |
| <i>OR6C6</i>  | -3,16E+13 | -3,10E+14 | 2,51E+14 | olfactory receptor family 6<br>subfamily C member 6                      |
| <i>OR6C68</i> | -3,03E+14 | -3,41E+13 | 2,35E+14 | olfactory receptor family 6<br>subfamily C member 68                     |
| <i>OR6C70</i> | -4,33E+14 | -2,84E+14 | 2,21E+14 | olfactory receptor family 6<br>subfamily C member 70                     |
| <i>OR6C74</i> | -6,13E+14 | -3,53E+14 | 3,06E+14 | olfactory receptor family 6<br>subfamily C member 74                     |
| <i>OR6C75</i> | -7,52E+14 | -2,37E+14 | 2,63E+14 | olfactory receptor family 6<br>subfamily C member 75                     |

|                |           |           |          |                                                                          |
|----------------|-----------|-----------|----------|--------------------------------------------------------------------------|
| <i>OR6C76</i>  | -3,26E+14 | -4,55E+14 | 3,05E+14 | olfactory receptor family 6<br>subfamily C member 76                     |
| <i>OR6F1</i>   | -2,04E+14 | -2,84E+14 | 3,48E+14 | olfactory receptor family 6<br>subfamily F member 1                      |
| <i>OR6K2</i>   | -3,99E+10 | -3,03E+14 | 2,30E+14 | olfactory receptor family 6<br>subfamily K member 2                      |
| <i>OR6K3</i>   | -1,84E+14 | -1,76E+14 |          | olfactory receptor family 6<br>subfamily K member 3                      |
| <i>OR6K6</i>   | -1,57E+14 | -2,11E+14 | 2,74E+13 | olfactory receptor family 6<br>subfamily K member 6                      |
| <i>OR6M1</i>   | -4,49E+14 | -3,50E+13 | 3,86E+14 | olfactory receptor family 6<br>subfamily M member 1                      |
| <i>OR6N2</i>   | -3,80E+13 |           | 1,69E+14 | olfactory receptor family 6<br>subfamily N member 2                      |
| <i>OR6P1</i>   | -2,00E+14 | -3,64E+14 | 1,93E+14 | olfactory receptor family 6<br>subfamily P member 1                      |
| <i>OR6Q1</i>   | -3,28E+14 | -2,80E+14 | 3,55E+14 | olfactory receptor family 6<br>subfamily Q member 1<br>(gene/pseudogene) |
| <i>OR6S1</i>   | -4,18E+14 | -3,78E+14 | 2,19E+14 | olfactory receptor family 6<br>subfamily S member 1                      |
| <i>OR6T1</i>   | -3,27E+14 | -3,17E+14 | 3,74E+14 | olfactory receptor family 6<br>subfamily T member 1                      |
| <i>OR6V1</i>   | -3,35E+14 | -1,53E+14 | 2,47E+14 | olfactory receptor family 6<br>subfamily V member 1                      |
| <i>OR6W1P</i>  | -3,28E+14 | -1,53E+14 | 2,90E+14 | olfactory receptor family 6<br>subfamily W member 1<br>pseudogene        |
| <i>OR6X1</i>   | -3,36E+13 | -3,16E+14 | 2,60E+14 | olfactory receptor family 6<br>subfamily X member 1                      |
| <i>OR6Y1</i>   | -2,97E+14 | -3,27E+14 | 3,20E+13 | olfactory receptor family 6<br>subfamily Y member 1                      |
| <i>OR7A10</i>  | -3,88E+14 | -4,27E+14 | 3,06E+14 | olfactory receptor family 7<br>subfamily A member 10                     |
| <i>OR7A17</i>  | -4,21E+14 | -2,71E+14 | 2,17E+14 | olfactory receptor family 7<br>subfamily A member 17                     |
| <i>OR7C1</i>   | -2,85E+14 | -3,66E+14 | 1,79E+14 | olfactory receptor family 7<br>subfamily C member 1                      |
| <i>OR7C2</i>   | -6,77E+14 | -2,17E+14 | 4,46E+14 | olfactory receptor family 7<br>subfamily C member 2<br>(gene/pseudogene) |
| <i>OR7D4</i>   | -2,71E+14 | -3,25E+14 | 2,12E+14 | olfactory receptor family 7<br>subfamily D member 4                      |
| <i>OR7E24</i>  | -5,75E+14 | -3,15E+14 | 2,10E+14 | olfactory receptor family 7<br>subfamily E member 24                     |
| <i>OR7E37P</i> | -2,06E+14 | -1,71E+14 | 1,48E+13 | olfactory receptor family 7<br>subfamily E member 37<br>pseudogene       |
| <i>OR7G1</i>   | -2,91E+14 | -4,04E+13 | 3,23E+14 | olfactory receptor family 7<br>subfamily G member 1                      |
| <i>OR7G2</i>   | -3,41E+14 | -4,59E+14 | 2,32E+14 | olfactory receptor family 7<br>subfamily G member 2                      |
| <i>OR7G3</i>   | -3,65E+14 | -3,25E+14 | 3,01E+13 | olfactory receptor family 7<br>subfamily G member 3                      |
| <i>OR8A1</i>   | -3,67E+13 | -2,65E+13 | 1,92E+14 | olfactory receptor family 8<br>subfamily A member 1                      |
| <i>OR8B12</i>  | -2,81E+14 | -3,64E+14 | 3,36E+14 | olfactory receptor family 8<br>subfamily B member 12                     |

|               |           |           |          |                                                                          |
|---------------|-----------|-----------|----------|--------------------------------------------------------------------------|
| <i>OR8B2</i>  | -3,29E+14 | -3,38E+14 | 2,70E+14 | olfactory receptor family 8<br>subfamily B member 2                      |
| <i>OR8B3</i>  | -2,83E+14 | -2,82E+14 | 3,07E+14 | olfactory receptor family 8<br>subfamily B member 3                      |
| <i>OR8B4</i>  | -3,01E+14 | -5,35E+14 | 2,53E+14 | olfactory receptor family 8<br>subfamily B member 4<br>(gene/pseudogene) |
| <i>OR8B8</i>  | -3,32E+13 | -2,94E+14 | 2,66E+14 | olfactory receptor family 8<br>subfamily B member 8                      |
| <i>OR8D1</i>  | -6,78E+14 | -4,96E+14 | 3,66E+14 | olfactory receptor family 8<br>subfamily D member 1                      |
| <i>OR8D2</i>  | -2,50E+14 | -4,06E+14 | 3,15E+14 | olfactory receptor family 8<br>subfamily D member 2<br>(gene/pseudogene) |
| <i>OR8D4</i>  | -3,21E+14 | -3,89E+13 | 2,98E+14 | olfactory receptor family 8<br>subfamily D member 4                      |
| <i>OR8G1</i>  | -2,17E+14 | -4,62E+12 |          | olfactory receptor family 8<br>subfamily G member 1<br>(gene/pseudogene) |
| <i>OR8G2P</i> | -4,56E+14 | -4,38E+14 | 2,30E+14 | olfactory receptor family 8<br>subfamily G member 2<br>pseudogene        |
| <i>OR8G5</i>  | -3,07E+14 | -1,91E+14 | 2,38E+14 | olfactory receptor family 8<br>subfamily G member 5                      |
| <i>OR8H1</i>  | -3,48E+14 | -3,53E+14 | 3,44E+14 | olfactory receptor family 8<br>subfamily H member 1                      |
| <i>OR8H2</i>  | -2,54E+14 | -3,68E+14 | 3,63E+14 | olfactory receptor family 8<br>subfamily H member 2                      |
| <i>OR8H3</i>  | -3,66E+14 | -3,49E+14 | 2,97E+13 | olfactory receptor family 8<br>subfamily H member 3                      |
| <i>OR8I2</i>  | -3,00E+14 | -6,33E+14 | 4,08E+14 | olfactory receptor family 8<br>subfamily I member 2                      |
| <i>OR8J1</i>  | -3,78E+14 | -6,32E+14 | 3,15E+14 | olfactory receptor family 8<br>subfamily J member 1                      |
| <i>OR8J3</i>  | -3,06E+14 | -2,69E+13 | 1,63E+14 | olfactory receptor family 8<br>subfamily J member 3                      |
| <i>OR8K1</i>  | -2,38E+14 | -5,72E+13 |          | olfactory receptor family 8<br>subfamily K member 1                      |
| <i>OR8K3</i>  | -3,10E+14 | -3,51E+14 | 2,58E+14 | olfactory receptor family 8<br>subfamily K member 3<br>(gene/pseudogene) |
| <i>OR8U1</i>  | -3,53E+14 | -2,61E+14 | 3,99E+14 | olfactory receptor family 8<br>subfamily U member 1                      |
| <i>OR9A4</i>  | -3,82E+14 | -2,27E+14 | 1,84E+14 | olfactory receptor family 9<br>subfamily A member 4                      |
| <i>OR9G1</i>  | -2,78E+13 | -4,90E+13 | 2,65E+14 | olfactory receptor family 9<br>subfamily G member 1                      |
| <i>OR9G4</i>  | -4,48E+14 | -4,42E+14 | 3,52E+14 | olfactory receptor family 9<br>subfamily G member 4                      |
| <i>OR9I1</i>  | -3,86E+14 | -7,29E+14 | 2,85E+14 | olfactory receptor family 9<br>subfamily I member 1                      |
| <i>OR9K2</i>  | -3,15E+14 | -3,63E+14 | 2,57E+14 | olfactory receptor family 9<br>subfamily K member 2                      |
| <i>OR9Q2</i>  | -4,69E+14 | -4,10E+14 | 2,95E+14 | olfactory receptor family 9<br>subfamily Q member 2                      |
| <i>OR1C1</i>  |           |           | 3,97E+14 | olfactory receptor family 1<br>subfamily C member 1                      |

|                 |          |                                                                          |
|-----------------|----------|--------------------------------------------------------------------------|
| <i>OR1F2P</i>   | 1,46E+14 | olfactory receptor family 1<br>subfamily F member 2<br>pseudogene        |
| <i>OR2AK2</i>   | 1,41E+14 | olfactory receptor family 2<br>subfamily AK member 2                     |
| <i>OR2B11</i>   | 1,83E+14 | olfactory receptor family 2<br>subfamily B member 11                     |
| <i>OR2L8</i>    | 1,70E+14 | olfactory receptor family 2<br>subfamily L member 8<br>(gene/pseudogene) |
| <i>OR2T33</i>   | 1,54E+14 | olfactory receptor family 2<br>subfamily T member 33                     |
| <i>OR2T8</i>    | 2,00E+14 | olfactory receptor family 2<br>subfamily T member 8                      |
| <i>OR3A2</i>    | 2,51E+13 | olfactory receptor family 3<br>subfamily A member 2                      |
| <i>OR52W1</i>   | 2,09E+14 | olfactory receptor family 52<br>subfamily W member 1                     |
| <i>OR56A4</i>   | 2,78E+14 | olfactory receptor family 56<br>subfamily A member 4                     |
| <i>OR5A1</i>    | 2,13E+14 | olfactory receptor family 5<br>subfamily A member 1                      |
| <i>OR7E156P</i> | 4,71E+13 | olfactory receptor family 7<br>subfamily E member 156<br>pseudogene      |
| <i>OR9A2</i>    | 2,63E+14 | olfactory receptor family 9<br>subfamily A member 2                      |

**Supplementary Table S2. Olfactory Receptors (ORs) differentially expressed included and used in hierarchical clustering.** We show the logarithmic fold change (logFC) of the 93 ORs used to construct the hierarchical clustering from mild nontreated gestational hypothyroidism (GHT) compared with the healthy thyroid pregnancy (HTP). We also show the ORs differentially expressed in preeclampsia (PEC) and HTP. Healthy nonpregnant women (NPG) libraries were used to evaluate the DEG in HTP.

| Symbol         | LogFC.GHT_HTP | LogFC.PEC_HTP | LogFC.HTP_NPG | Name                                                                |
|----------------|---------------|---------------|---------------|---------------------------------------------------------------------|
| <i>OR10A3</i>  | -4,32E+14     | -3,58E+14     | 2,90E+14      | olfactory receptor family 10 subfamily A member 3                   |
| <i>OR10A7</i>  | -3,57E+14     | -3,13E+14     | 3,09E+14      | olfactory receptor family 10 subfamily A member 7                   |
| <i>OR10C1</i>  | -3,56E+14     | -3,60E+11     | 3,20E+14      | olfactory receptor family 10 subfamily C member 1 (gene/pseudogene) |
| <i>OR10G3</i>  | -3,44E+14     | -3,83E+14     | 2,00E+14      | olfactory receptor family 10 subfamily G member 3                   |
| <i>OR10G4</i>  | -3,18E+14     | -3,53E+14     | 2,96E+14      | olfactory receptor family 10 subfamily G member 4                   |
| <i>OR10G7</i>  | -3,51E+14     | -4,45E+13     | 2,37E+14      | olfactory receptor family 10 subfamily G member 7                   |
| <i>OR10G8</i>  | -3,61E+14     | -3,26E+14     | 3,15E+14      | olfactory receptor family 10 subfamily G member 8                   |
| <i>OR10H4</i>  | -3,88E+14     | -3,81E+14     | 2,68E+14      | olfactory receptor family 10 subfamily H member 4                   |
| <i>OR10J5</i>  | -3,97E+14     | -3,62E+14     | 2,68E+14      | olfactory receptor family 10 subfamily J member 5                   |
| <i>OR11H12</i> | -3,93E+14     | -4,02E+14     | 3,25E+14      | olfactory receptor family 11 subfamily H member 12                  |
| <i>OR12D2</i>  | -3,80E+14     | -3,36E+14     | 2,29E+14      | olfactory receptor family 12 subfamily D member 2 (gene/pseudogene) |
| <i>OR12D3</i>  | -4,48E+14     | -5,25E+14     | 3,01E+14      | olfactory receptor family 12 subfamily D member 3                   |
| <i>OR13C2</i>  | -3,72E+14     | -4,29E+14     | 2,54E+14      | olfactory receptor family 13 subfamily C member 2                   |
| <i>OR13F1</i>  | -3,12E+14     | -3,53E+14     | 2,43E+14      | olfactory receptor family 13 subfamily F member 1                   |
| <i>OR1J2</i>   | -3,77E+14     | -3,67E+14     | 2,26E+14      | olfactory receptor family 1 subfamily J member 2                    |
| <i>OR1J4</i>   | -3,70E+14     | -3,89E+14     | 1,92E+14      | olfactory receptor family 1 subfamily J member 4                    |
| <i>OR1S2</i>   | -3,44E+14     | -4,25E+14     | 3,55E+14      | olfactory receptor family 1 subfamily S member 2                    |
| <i>OR2A14</i>  | -4,00E+14     | -3,34E+14     | 2,00E+14      | olfactory receptor family 2 subfamily A member 14                   |
| <i>OR2AG1</i>  | -3,60E+14     | -3,19E+14     | 2,19E+14      | olfactory receptor family 2 subfamily AG member 1 (gene/pseudogene) |
| <i>OR2AG2</i>  | -4,23E+14     | -4,15E+14     | 2,35E+14      | olfactory receptor family 2 subfamily AG member 2                   |
| <i>OR2F2</i>   | -4,11E+14     | -3,48E+14     | 1,65E+14      | olfactory receptor family 2 subfamily F member 2                    |
| <i>OR2G2</i>   | -3,02E+14     | -3,79E+14     | 2,17E+13      | olfactory receptor family 2 subfamily G member 2                    |
| <i>OR2G6</i>   | -3,69E+14     | -3,36E+14     | 1,82E+14      | olfactory receptor family 2 subfamily G member 6                    |
| <i>OR2K2</i>   | -3,44E+14     | -4,37E+13     | 2,77E+14      | olfactory receptor family 2 subfamily K member 2                    |

|               |           |           |          |                                                                          |
|---------------|-----------|-----------|----------|--------------------------------------------------------------------------|
| <i>OR2T1</i>  | -3,32E+14 | -3,51E+14 | 2,90E+14 | olfactory receptor family 2<br>subfamily T member 1                      |
| <i>OR2T27</i> | -3,67E+14 | -3,76E+13 | 3,20E+14 | olfactory receptor family 2<br>subfamily T member 27                     |
| <i>OR2T4</i>  | -3,51E+14 | -4,06E+14 | 3,15E+14 | olfactory receptor family 2<br>subfamily T member 4                      |
| <i>OR2V2</i>  | -3,71E+14 | -3,17E+14 | 2,58E+14 | olfactory receptor family 2<br>subfamily V member 2                      |
| <i>OR2Z1</i>  | -3,41E+14 | -3,31E+14 | 2,12E+14 | olfactory receptor family 2<br>subfamily Z member 1                      |
| <i>OR4A15</i> | -3,06E+14 | -3,44E+14 | 1,90E+14 | olfactory receptor family 4<br>subfamily A member 15                     |
| <i>OR4A5</i>  | -3,33E+14 | -4,09E+14 | 4,53E+14 | olfactory receptor family 4<br>subfamily A member 5                      |
| <i>OR4B1</i>  | -3,36E+14 | -3,62E+14 | 2,53E+14 | olfactory receptor family 4<br>subfamily B member 1                      |
| <i>OR4C12</i> | -6,28E+14 | -6,28E+14 | 2,35E+14 | olfactory receptor family 4<br>subfamily C member 12                     |
| <i>OR4C15</i> | -4,69E+14 | -5,41E+14 | 4,46E+14 | olfactory receptor family 4<br>subfamily C member 15                     |
| <i>OR4C3</i>  | -4,17E+14 | -3,62E+14 | 2,07E+14 | olfactory receptor family 4<br>subfamily C member 3                      |
| <i>OR4C46</i> | -3,18E+14 | -3,39E+13 | 3,00E+14 | olfactory receptor family 4<br>subfamily C member 46                     |
| <i>OR4C6</i>  | -3,74E+14 | -3,12E+14 | 3,55E+14 | olfactory receptor family 4<br>subfamily C member 6                      |
| <i>OR4D2</i>  | -3,20E+14 | -3,08E+14 | 1,88E+14 | olfactory receptor family 4<br>subfamily D member 2                      |
| <i>OR4D9</i>  | -3,79E+14 | -3,20E+14 | 2,69E+14 | olfactory receptor family 4<br>subfamily D member 9                      |
| <i>OR4E2</i>  | -3,44E+14 | -3,05E+13 | 2,64E+14 | olfactory receptor family 4<br>subfamily E member 2<br>(gene/pseudogene) |
| <i>OR4K15</i> | -4,23E+14 | -3,35E+14 | 2,97E+14 | olfactory receptor family 4<br>subfamily K member 15                     |
| <i>OR4K5</i>  | -3,07E+13 | -3,00E+14 | 2,88E+14 | olfactory receptor family 4<br>subfamily K member 5                      |
| <i>OR4L1</i>  | -3,52E+13 | -3,17E+14 | 4,05E+14 | olfactory receptor family 4<br>subfamily L member 1<br>(gene/pseudogene) |
| <i>OR4M1</i>  | -4,59E+14 | -4,89E+14 | 3,37E+14 | olfactory receptor family 4<br>subfamily M member 1                      |
| <i>OR4M2</i>  | -3,89E+14 | -4,34E+14 | 3,63E+14 | olfactory receptor family 4<br>subfamily M member 2                      |
| <i>OR4N3P</i> | -4,21E+14 | -4,30E+14 | 2,92E+14 | olfactory receptor family 4<br>subfamily N member 3<br>pseudogene        |
| <i>OR4N5</i>  | -3,85E+14 | -3,47E+14 | 2,86E+14 | olfactory receptor family 4<br>subfamily N member 5                      |
| <i>OR4X1</i>  | -3,46E+14 | -3,60E+14 | 3,51E+14 | olfactory receptor family 4<br>subfamily X member 1<br>(gene/pseudogene) |
| <i>OR51A7</i> | -3,87E+14 | -3,88E+14 | 3,51E+14 | olfactory receptor family<br>51 subfamily A member 7                     |
| <i>OR51B4</i> | -3,77E+14 | -3,22E+14 | 2,85E+14 | olfactory receptor family<br>51 subfamily B member 4                     |
| <i>OR51B6</i> | -3,59E+14 | -3,42E+14 | 2,57E+14 | olfactory receptor family<br>51 subfamily B member 6                     |

|                |           |           |          |                                                                    |
|----------------|-----------|-----------|----------|--------------------------------------------------------------------|
| <i>OR51G2</i>  | -5,10E+14 | -4,98E+13 | 3,04E+13 | olfactory receptor family 51 subfamily G member 2                  |
| <i>OR51V1</i>  | -3,07E+13 | -3,97E+14 | 3,02E+14 | olfactory receptor family 51 subfamily V member 1                  |
| <i>OR52E2</i>  | -3,63E+14 | -3,09E+14 | 2,74E+14 | olfactory receptor family 52 subfamily E member 2                  |
| <i>OR52E8</i>  | -4,82E+13 | -3,87E+14 | 2,91E+13 | olfactory receptor family 52 subfamily E member 8                  |
| <i>OR56A3</i>  | -3,60E+14 | -3,65E+14 | 2,54E+14 | olfactory receptor family 56 subfamily A member 3                  |
| <i>OR56A5</i>  | -3,33E+14 | -3,25E+14 | 2,45E+14 | olfactory receptor family 56 subfamily A member 5                  |
| <i>OR5AK4P</i> | -4,39E+14 | -4,27E+14 | 3,31E+14 | olfactory receptor family 5 subfamily AK member 4 pseudogene       |
| <i>OR5B12</i>  | -3,12E+13 | -3,42E+13 | 3,24E+13 | olfactory receptor family 5 subfamily B member 12                  |
| <i>OR5E1P</i>  | -5,99E+14 | -5,99E+14 | 2,27E+14 | olfactory receptor family 5 subfamily E member 1 pseudogene        |
| <i>OR5H1</i>   | -3,23E+14 | -4,10E+14 | 3,79E+14 | olfactory receptor family 5 subfamily H member 1                   |
| <i>OR5H14</i>  | -3,90E+14 | -3,21E+14 | 2,52E+14 | olfactory receptor family 5 subfamily H member 14                  |
| <i>OR5H6</i>   | -4,62E+14 | -4,62E+14 |          | olfactory receptor family 5 subfamily H member 6 (gene/pseudogene) |
| <i>OR5K4</i>   | -3,08E+14 | -3,15E+14 | 2,90E+14 | olfactory receptor family 5 subfamily K member 4                   |
| <i>OR5L1</i>   | -3,02E+14 | -3,50E+14 | 2,76E+14 | olfactory receptor family 5 subfamily L member 1 (gene/pseudogene) |
| <i>OR5L2</i>   | -3,86E+14 | -3,11E+14 | 2,76E+14 | olfactory receptor family 5 subfamily L member 2                   |
| <i>OR5M10</i>  | -4,12E+13 | -4,85E+14 | 2,47E+14 | olfactory receptor family 5 subfamily M member 10                  |
| <i>OR5M11</i>  | -3,18E+14 | -3,22E+14 | 2,46E+14 | olfactory receptor family 5 subfamily M member 11                  |
| <i>OR5M8</i>   | -4,81E+14 | -3,98E+14 | 3,30E+14 | olfactory receptor family 5 subfamily M member 8                   |
| <i>OR5P2</i>   | -3,07E+14 | -3,52E+14 | 3,05E+14 | olfactory receptor family 5 subfamily P member 2                   |
| <i>OR5P3</i>   | -3,60E+14 | -3,52E+14 | 2,57E+14 | olfactory receptor family 5 subfamily P member 3                   |
| <i>OR5T3</i>   | -3,94E+14 | -3,44E+14 | 3,42E+14 | olfactory receptor family 5 subfamily T member 3                   |
| <i>OR6B2</i>   | -3,39E+14 | -4,35E+14 | 2,54E+14 | olfactory receptor family 6 subfamily B member 2                   |
| <i>OR6C1</i>   | -3,22E+14 | -3,64E+14 | 1,82E+14 | olfactory receptor family 6 subfamily C member 1                   |
| <i>OR6C3</i>   | -5,17E+14 | -5,17E+14 | 3,58E+14 | olfactory receptor family 6 subfamily C member 3                   |
| <i>OR6C6</i>   | -3,16E+13 | -3,10E+14 | 2,51E+14 | olfactory receptor family 6 subfamily C member 6                   |
| <i>OR6C68</i>  | -3,03E+14 | -3,41E+13 | 2,35E+14 | olfactory receptor family 6 subfamily C member 68                  |
| <i>OR6K2</i>   | -3,99E+10 | -3,03E+14 | 2,30E+14 | olfactory receptor family 6 subfamily K member 2                   |



|               |           |           |          |                                                                          |
|---------------|-----------|-----------|----------|--------------------------------------------------------------------------|
| <i>OR6M1</i>  | -4,49E+14 | -3,50E+13 | 3,86E+14 | olfactory receptor family 6<br>subfamily M member 1                      |
| <i>OR6S1</i>  | -4,18E+14 | -3,78E+14 | 2,19E+14 | olfactory receptor family 6<br>subfamily S member 1                      |
| <i>OR6T1</i>  | -3,27E+14 | -3,17E+14 | 3,74E+14 | olfactory receptor family 6<br>subfamily T member 1                      |
| <i>OR6X1</i>  | -3,36E+13 | -3,16E+14 | 2,60E+14 | olfactory receptor family 6<br>subfamily X member 1                      |
| <i>OR7A10</i> | -3,88E+14 | -4,27E+14 | 3,06E+14 | olfactory receptor family 7<br>subfamily A member 10                     |
| <i>OR7G3</i>  | -3,65E+14 | -3,25E+14 | 3,01E+13 | olfactory receptor family 7<br>subfamily G member 3                      |
| <i>OR8B2</i>  | -3,29E+14 | -3,38E+14 | 2,70E+14 | olfactory receptor family 8<br>subfamily B member 2                      |
| <i>OR8D4</i>  | -3,21E+14 | -3,89E+13 | 2,98E+14 | olfactory receptor family 8<br>subfamily D member 4                      |
| <i>OR8G2P</i> | -4,56E+14 | -4,38E+14 | 2,30E+14 | olfactory receptor family 8<br>subfamily G member 2<br>pseudogene        |
| <i>OR8H1</i>  | -3,48E+14 | -3,53E+14 | 3,44E+14 | olfactory receptor family 8<br>subfamily H member 1                      |
| <i>OR8H3</i>  | -3,66E+14 | -3,49E+14 | 2,97E+13 | olfactory receptor family 8<br>subfamily H member 3                      |
| <i>OR8K3</i>  | -3,10E+14 | -3,51E+14 | 2,58E+14 | olfactory receptor family 8<br>subfamily K member 3<br>(gene/pseudogene) |
| <i>OR9G4</i>  | -4,48E+14 | -4,42E+14 | 3,52E+14 | olfactory receptor family 9<br>subfamily G member 4                      |
| <i>OR9K2</i>  | -3,15E+14 | -3,63E+14 | 2,57E+14 | olfactory receptor family 9<br>subfamily K member 2                      |
| <i>OR9Q2</i>  | -4,69E+14 | -4,10E+14 | 2,95E+14 | olfactory receptor family 9<br>subfamily Q member 2                      |

**Supplementary Table S3. Olfactory Receptors (ORs) differentially expressed excluded.** We removed 102 ORs that presented logarithmic fold change (logFC) cutoffs of  $> -3.0$  at least in one dataset (mild

nontreated gestational hypothyroidism - GHT, preeclampsia - PEC and healthy thyroid pregnancy - HTP). The table presented the LogFC from each group. Healthy nonpregnant women (NPG) was used to call the HTP DEG.

| Symbol         | LogFC.GHT_HTP | LogFC.PEC_HTP | LogFC.HTP_NPG | Name                                               |
|----------------|---------------|---------------|---------------|----------------------------------------------------|
| <i>OR10A2</i>  | -3,22E+13     | -2,78E+14     | 2,63E+14      | olfactory receptor family 10 subfamily A member 2  |
| <i>OR10A5</i>  | -3,30E+14     | -2,49E+14     | 2,30E+14      | olfactory receptor family 10 subfamily A member 5  |
| <i>OR10H5</i>  | -2,56E+14     | -3,26E+14     | 2,46E+12      | olfactory receptor family 10 subfamily H member 5  |
| <i>OR10J3</i>  | -2,32E+14     | -2,75E+14     | 2,42E+14      | olfactory receptor family 10 subfamily J member 3  |
| <i>OR10K1</i>  | -2,68E+14     | -2,76E+14     | 2,91E+14      | olfactory receptor family 10 subfamily K member 1  |
| <i>OR10K2</i>  | -2,81E+14     | -2,71E+14     | 2,26E+14      | olfactory receptor family 10 subfamily K member 2  |
| <i>OR10V1</i>  | -2,45E+14     | -2,67E+14     | 2,80E+14      | olfactory receptor family 10 subfamily V member 1  |
| <i>OR10W1</i>  | -2,82E+14     | -3,08E+14     | 2,58E+14      | olfactory receptor family 10 subfamily W member 1  |
| <i>OR10Z1</i>  | -2,25E+14     | -2,43E+14     | 2,50E+13      | olfactory receptor family 10 subfamily Z member 1  |
| <i>OR11G2</i>  | -3,23E+14     | -2,53E+14     | 3,02E+14      | olfactory receptor family 11 subfamily G member 2  |
| <i>OR11H1</i>  | -2,82E+13     | -3,11E+14     | 3,13E+14      | olfactory receptor family 11 subfamily H member 1  |
| <i>OR11H2</i>  | -3,09E+14     | -2,76E+14     | 3,47E+14      | olfactory receptor family 11 subfamily H member 2  |
| <i>OR13C8</i>  | -3,63E+14     | -2,94E+14     | 2,04E+14      | olfactory receptor family 13 subfamily C member 8  |
| <i>OR13J1</i>  | -2,47E+14     | -3,33E+14     | 2,22E+14      | olfactory receptor family 13 subfamily J member 1  |
| <i>OR14A16</i> | -2,89E+14     | -2,97E+14     | 2,72E+14      | olfactory receptor family 14 subfamily A member 16 |
| <i>OR14J1</i>  | -2,31E+14     | -2,77E+14     | 3,07E+14      | olfactory receptor family 14 subfamily J member 1  |
| <i>OR1A2</i>   | -3,48E+14     | -2,53E+14     | 3,48E+14      | olfactory receptor family 1 subfamily A member 2   |
| <i>OR1D5</i>   | -2,86E+14     | -3,24E+13     | 2,03E+14      | olfactory receptor family 1 subfamily D member 5   |
| <i>OR1E1</i>   | -2,65E+14     | -3,47E+14     | 3,08E+14      | olfactory receptor family 1 subfamily E member 1   |
| <i>OR1E2</i>   | -3,12E+14     | -2,90E+14     | 2,67E+12      | olfactory receptor family 1 subfamily E member 2   |
| <i>OR1F1</i>   | -3,50E+14     | -2,76E+14     | 1,96E+13      | olfactory receptor family 1 subfamily F member 1   |
| <i>OR1J1</i>   | -3,01E+14     | -2,99E+14     | 2,00E+13      | olfactory receptor family 1 subfamily J member 1   |
| <i>OR1L1</i>   | -2,90E+14     | -2,77E+14     | 2,31E+14      | olfactory receptor family 1 subfamily L member 1   |
| <i>OR1L4</i>   | -1,93E+14     | -1,46E+14     | 1,75E+14      | olfactory receptor family 1 subfamily L member 4   |
| <i>OR1L6</i>   | -2,03E+14     | -1,99E+14     |               | olfactory receptor family 1 subfamily L member 6   |
| <i>OR1N2</i>   | -3,24E+14     | -2,41E+14     | 2,22E+14      | olfactory receptor family 1 subfamily N member 2   |

|               |           |           |          |                                                                          |
|---------------|-----------|-----------|----------|--------------------------------------------------------------------------|
| <i>OR1S1</i>  | -2,60E+14 | -2,77E+14 | 2,99E+14 | olfactory receptor family 1<br>subfamily S member 1<br>(gene/pseudogene) |
| <i>OR2A2</i>  | -3,43E+14 | -2,84E+14 | 3,25E+14 | olfactory receptor family 2<br>subfamily A member 2                      |
| <i>OR2A25</i> | -3,33E+14 | -2,34E+14 | 2,72E+14 | olfactory receptor family 2<br>subfamily A member 25                     |
| <i>OR2B2</i>  | -2,11E+14 | -2,75E+14 | 1,78E+14 | olfactory receptor family 2<br>subfamily B member 2                      |
| <i>OR2D3</i>  | -2,75E+14 | -2,83E+14 | 2,12E+13 | olfactory receptor family 2<br>subfamily D member 3                      |
| <i>OR2H2</i>  | -2,29E+14 | -2,05E+14 | 1,96E+14 | olfactory receptor family 2<br>subfamily H member 2                      |
| <i>OR2J3</i>  | -3,18E+14 | -2,64E+14 | 2,43E+14 | olfactory receptor family 2<br>subfamily J member 3                      |
| <i>OR2L3</i>  | -2,94E+14 | -2,84E+14 | 2,47E+14 | olfactory receptor family 2<br>subfamily L member 3                      |
| <i>OR2M2</i>  | -2,13E+14 | -2,57E+13 | 1,84E+14 | olfactory receptor family 2<br>subfamily M member 2                      |
| <i>OR2M3</i>  | -3,28E+14 | -2,36E+14 |          | olfactory receptor family 2<br>subfamily M member 3                      |
| <i>OR2M4</i>  | -2,45E+14 | -3,08E+14 | 3,87E+14 | olfactory receptor family 2<br>subfamily M member 4                      |
| <i>OR2T10</i> | -2,54E+14 | -2,56E+14 | 1,58E+14 | olfactory receptor family 2<br>subfamily T member 10                     |
| <i>OR2T2</i>  | -2,50E+13 | -2,93E+14 | 2,40E+14 | olfactory receptor family 2<br>subfamily T member 2                      |
| <i>OR2T29</i> | -2,87E+14 | -2,46E+14 | 3,45E+14 | olfactory receptor family 2<br>subfamily T member 29                     |
| <i>OR2T35</i> | -2,27E+14 | -1,94E+13 | 1,88E+14 | olfactory receptor family 2<br>subfamily T member 35                     |
| <i>OR2T6</i>  | -2,82E+14 | -3,64E+14 | 1,91E+14 | olfactory receptor family 2<br>subfamily T member 6                      |
| <i>OR2Y1</i>  | -2,61E+14 | -2,65E+14 | 1,60E+14 | olfactory receptor family 2<br>subfamily Y member 1                      |
| <i>OR3A1</i>  | -3,17E+14 | -2,43E+14 | 1,57E+14 | olfactory receptor family 3<br>subfamily A member 1<br>(gene/pseudogene) |
| <i>OR3A4P</i> | -2,73E+14 | -3,60E+14 | 3,09E+14 | olfactory receptor family 3<br>subfamily A member 4<br>pseudogene        |
| <i>OR4A16</i> | -2,69E+14 | -3,21E+14 | 2,58E+14 | olfactory receptor family 4<br>subfamily A member 16                     |
| <i>OR4A47</i> | -2,68E+14 | -2,85E+14 | 2,36E+14 | olfactory receptor family 4<br>subfamily A member 47                     |
| <i>OR4C13</i> | -2,71E+14 | -3,01E+14 | 3,65E+14 | olfactory receptor family 4<br>subfamily C member 13                     |
| <i>OR4D10</i> | -3,29E+14 | -2,81E+14 | 1,96E+14 | olfactory receptor family 4<br>subfamily D member 10                     |
| <i>OR4D5</i>  | -2,89E+14 | -3,27E+14 | 2,51E+13 | olfactory receptor family 4<br>subfamily D member 5                      |
| <i>OR4F15</i> | -3,11E+14 | -2,77E+14 | 1,65E+14 | olfactory receptor family 4<br>subfamily F member 15                     |
| <i>OR4F21</i> | -2,14E+14 | -1,27E+14 | 1,83E+14 | olfactory receptor family 4<br>subfamily F member 21                     |
| <i>OR4F4</i>  | -2,74E+14 | -1,91E+14 | 3,42E+14 | olfactory receptor family 4<br>subfamily F member 4                      |
| <i>OR4N4</i>  | -2,85E+14 | -2,50E+14 | 2,36E+14 | olfactory receptor family 4<br>subfamily N member 4                      |

|               |           |           |          |                                                                           |
|---------------|-----------|-----------|----------|---------------------------------------------------------------------------|
| <i>OR4X2</i>  | -2,91E+14 | -2,65E+14 | 3,46E+14 | olfactory receptor family 4<br>subfamily X member 2<br>(gene/pseudogene)  |
| <i>OR51A4</i> | -2,77E+14 | -3,34E+14 | 2,69E+13 | olfactory receptor family 51<br>subfamily A member 4                      |
| <i>OR51B2</i> | -2,47E+14 | -2,24E+14 | 3,13E+14 | olfactory receptor family 51<br>subfamily B member 2<br>(gene/pseudogene) |
| <i>OR51G1</i> | -2,51E+14 | -2,35E+14 | 1,84E+14 | olfactory receptor family 51<br>subfamily G member 1<br>(gene/pseudogene) |
| <i>OR51H1</i> | -2,34E+14 | -3,18E+14 | 3,05E+14 | olfactory receptor family 51<br>subfamily I member 1                      |
| <i>OR51L1</i> | -2,86E+13 | -3,16E+14 | 2,79E+14 | olfactory receptor family 51<br>subfamily L member 1                      |
| <i>OR51M1</i> | -2,28E+14 | -2,35E+14 | 2,01E+14 | olfactory receptor family 51<br>subfamily M member 1                      |
| <i>OR51Q1</i> | -3,44E+14 | -2,57E+14 | 2,17E+14 | olfactory receptor family 51<br>subfamily Q member 1<br>(gene/pseudogene) |
| <i>OR51T1</i> | -2,57E+14 | -3,27E+14 | 2,96E+14 | olfactory receptor family 51<br>subfamily T member 1                      |
| <i>OR52A5</i> | -2,71E+14 | -3,59E+14 | 3,08E+14 | olfactory receptor family 52<br>subfamily A member 5                      |
| <i>OR52B4</i> | -2,67E+11 | -2,74E+14 | 3,06E+14 | olfactory receptor family 52<br>subfamily B member 4<br>(gene/pseudogene) |
| <i>OR52D1</i> | -2,89E+14 | -3,74E+14 | 2,67E+14 | olfactory receptor family 52<br>subfamily D member 1<br>(gene/pseudogene) |
| <i>OR52E4</i> | -2,48E+14 | -2,87E+14 | 4,85E+14 | olfactory receptor family 52<br>subfamily E member 4                      |
| <i>OR52I2</i> | -1,75E+14 | -2,64E+14 | 1,56E+14 | olfactory receptor family 52<br>subfamily I member 2                      |
| <i>OR52J3</i> | -2,89E+14 | -3,19E+14 | 2,51E+14 | olfactory receptor family 52<br>subfamily J member 3                      |
| <i>OR52L1</i> | -2,24E+14 | -2,11E+14 | 2,40E+14 | olfactory receptor family 52<br>subfamily L member 1<br>(gene/pseudogene) |
| <i>OR52N5</i> | -2,73E+14 | -2,59E+14 | 2,12E+14 | olfactory receptor family 52<br>subfamily N member 5                      |
| <i>OR52R1</i> | -3,45E+14 | -2,84E+13 | 3,14E+14 | olfactory receptor family 52<br>subfamily R member 1<br>(gene/pseudogene) |
| <i>OR56B4</i> | -2,78E+14 | -1,79E+14 | 2,49E+14 | olfactory receptor family 56<br>subfamily B member 4                      |
| <i>OR5AN1</i> | -2,83E+14 | -2,87E+14 | 2,96E+14 | olfactory receptor family 5<br>subfamily AN member 1                      |
| <i>OR5AS1</i> | -2,80E+14 | -1,84E+13 | 2,05E+14 | olfactory receptor family 5<br>subfamily AS member 1                      |
| <i>OR5AU1</i> | -2,70E+14 | -3,41E+13 | 2,88E+14 | olfactory receptor family 5<br>subfamily AU member 1                      |
| <i>OR5B2</i>  | -3,28E+11 | -2,36E+14 | 2,49E+14 | olfactory receptor family 5<br>subfamily B member 2                       |
| <i>OR5B3</i>  | -2,42E+14 | -3,24E+14 |          | olfactory receptor family 5<br>subfamily B member 3                       |
| <i>OR5C1</i>  | -2,73E+14 | -1,81E+14 | 1,83E+14 | olfactory receptor family 5<br>subfamily C member 1                       |

|                |           |           |          |                                                                           |
|----------------|-----------|-----------|----------|---------------------------------------------------------------------------|
| <i>OR5D13</i>  | -2,49E+14 | -3,03E+14 | 1,93E+14 | olfactory receptor family 5<br>subfamily D member 13<br>(gene/pseudogene) |
| <i>OR5D14</i>  | -3,57E+14 | -2,83E+14 | 2,84E+14 | olfactory receptor family 5<br>subfamily D member 14                      |
| <i>OR5H15</i>  | -3,01E+14 | -2,95E+14 | 5,67E+14 | olfactory receptor family 5<br>subfamily H member 15                      |
| <i>OR5K3</i>   | -2,70E+14 | -2,36E+14 | 2,71E+14 | olfactory receptor family 5<br>subfamily K member 3                       |
| <i>OR5M1</i>   | -2,52E+14 | -3,38E+14 | 2,63E+14 | olfactory receptor family 5<br>subfamily M member 1                       |
| <i>OR5M9</i>   | -2,26E+14 | -2,31E+14 | 2,51E+14 | olfactory receptor family 5<br>subfamily M member 9                       |
| <i>OR5R1</i>   | -3,16E+14 | -2,68E+14 | 2,70E+14 | olfactory receptor family 5<br>subfamily R member 1<br>(gene/pseudogene)  |
| <i>OR5T1</i>   | -3,21E+14 | -2,31E+14 | 2,91E+14 | olfactory receptor family 5<br>subfamily T member 1                       |
| <i>OR5V1</i>   | -2,67E+14 | -2,64E+14 | 2,34E+14 | olfactory receptor family 5<br>subfamily V member 1                       |
| <i>OR6A2</i>   | -3,52E+14 | -2,87E+14 | 2,84E+14 | olfactory receptor family 6<br>subfamily A member 2                       |
| <i>OR6F1</i>   | -2,04E+14 | -2,84E+14 | 3,48E+14 | olfactory receptor family 6<br>subfamily F member 1                       |
| <i>OR6K3</i>   | -1,84E+14 | -1,76E+14 |          | olfactory receptor family 6<br>subfamily K member 3                       |
| <i>OR6K6</i>   | -1,57E+14 | -2,11E+14 | 2,74E+13 | olfactory receptor family 6<br>subfamily K member 6                       |
| <i>OR6Q1</i>   | -3,28E+14 | -2,80E+14 | 3,55E+14 | olfactory receptor family 6<br>subfamily Q member 1<br>(gene/pseudogene)  |
| <i>OR6Y1</i>   | -2,97E+14 | -3,27E+14 | 3,20E+13 | olfactory receptor family 6<br>subfamily Y member 1                       |
| <i>OR7C1</i>   | -2,85E+14 | -3,66E+14 | 1,79E+14 | olfactory receptor family 7<br>subfamily C member 1                       |
| <i>OR7D4</i>   | -2,71E+14 | -3,25E+14 | 2,12E+14 | olfactory receptor family 7<br>subfamily D member 4                       |
| <i>OR7E37P</i> | -2,06E+14 | -1,71E+14 | 1,48E+13 | olfactory receptor family 7<br>subfamily E member 37<br>pseudogene        |
| <i>OR8B12</i>  | -2,81E+14 | -3,64E+14 | 3,36E+14 | olfactory receptor family 8<br>subfamily B member 12                      |
| <i>OR8B3</i>   | -2,83E+14 | -2,82E+14 | 3,07E+14 | olfactory receptor family 8<br>subfamily B member 3                       |
| <i>OR8B8</i>   | -3,32E+13 | -2,94E+14 | 2,66E+14 | olfactory receptor family 8<br>subfamily B member 8                       |
| <i>OR8J3</i>   | -3,06E+14 | -2,69E+13 | 1,63E+14 | olfactory receptor family 8<br>subfamily J member 3                       |
| <i>OR8U1</i>   | -3,53E+14 | -2,61E+14 | 3,99E+14 | olfactory receptor family 8<br>subfamily U member 1                       |
